# Supplementary material for: Generation of an Ovomucoid-Immune scFv Library for the Development of Novel Immunoassays in Hen’s Egg Detection
Source: MDPI journal article supplement (doi:10.3390/foods12203831), 2023-10-19
Supplement: s1 [file s1]

**Table S1.** Oligonucleotides used for the amplification, assembly and sequencing of the immune phage library.

| Primer name                              | Sequence                                                                         |
|------------------------------------------|----------------------------------------------------------------------------------|
| <i>V<sub>L</sub> forward primers (4)</i> |                                                                                  |
| VL5' <i>Sfi</i> I- K                     | 5' GGGCCCAGGCGGCCGAGCTCGTGMTGACCCAGACTCCA 3'                                     |
|                                          | 5' GGGCCCAGGCGGCCGAGCTCGATMTGACCCAGACTCCA 3'                                     |
|                                          | 5' GGGCCCAGGCGGCCGAGCTCGTGATGACCCAGACTGAA 3'                                     |
| VL5' <i>Sfi</i> I- λ                     | 3' GGGCCCAGGCGGCCGACTCAGTCGCCCTC 5'                                              |
| <i>V<sub>H</sub> reverse primers (4)</i> |                                                                                  |
| VL3' Linker- K                           | 5' GGAAGATCTAGAGGAACCAACCCCAACACCGCCGAGCCACCGCCACCAGAGGATTTGATTTCCACATTGGTGCC 3' |
|                                          | 5' GGAAGATCTAGAGGAACCAACCCCAACACCGCCGAGCCACCGCCACCAGAGGATAGGATCTCCAGCTCGGTCCC 3' |
|                                          | 5' GGAAGATCTAGAGGAACCAACCCCAACACCGCCGAGCCACCGCCACCAGAGGATTTGACSAACCACTCGGTCCC 3' |
| VL3' Linker- λ                           | 5' GAAGATCTAGAGGAACCAACCCCAACACCGCCGAGCCACCGCCACCAGAGGAGCCTGTGACGGTCAGGGTCCC 3'  |
| <i>V<sub>H</sub> forward primers (4)</i> |                                                                                  |
| VH5' Linker                              | 5' GGTGGTTCCTCTAGATCTTCCAGTCGGTGGAGGAGTCCRGG 3'                                  |
|                                          | 5' GGTGGTTCCTCTAGATCTTCCAGTCGGTGAAGGAGTCCGAG 3'                                  |
|                                          | 5' GGTGGTTCCTCTAGATCTTCCAGTCGYTGGAGGAGTCCGGG 3'                                  |
|                                          | 5' GGTGGTTCCTCTAGATCTTCCAGSAGCAGCTGRTGGAGTCCGG 3'                                |
| <i>V<sub>H</sub> reverse primers (1)</i> |                                                                                  |
| VH3' <i>Sfi</i> I                        | 5' CCTGGCCGGCCTGGCCACTAGTGACTGAYGGAGCCTTAGGTTGCCC3'                              |
| <i>Overlap extension PCR primers</i>     |                                                                                  |
| 5' <i>Sfi</i> I-VL                       | 5' GAGGAGGAGGAGGAGGAGGCGGGGCCAGCGGCCGAGCTC 3'                                    |
| 3' <i>Sfi</i> I-VH                       | 5' GAGGAGGAGGAGGAGGAGCCTGGCCGGCCTGGCCACTAGTG 3'                                  |
| <i>Sequencing primers</i>                |                                                                                  |
| ompAseq                                  | 5' AAGACAGCTATCGCGATTGCAG 3'                                                     |
| g-back                                   | 5' GCCCCCTTATTAGCGTTTGCCATC 3'                                                   |

**Table S2.** Conditions employed in the biopanning process against ovomucoid and boiled egg white throughout the four rounds of selection.

| Biopanning round | Coated ovomucoid (µg/mL) | Coated boiled egg white (µg/mL) | Number of washes |
|------------------|--------------------------|---------------------------------|------------------|
| 1                | 10                       | 100                             | 5                |
| 2                | 10                       | 100                             | 10               |
| 3                | 5                        | 50                              | 15               |
| 4                | 5                        | 50                              | 15               |

**Table S3.** PRODIGY results generated from the interactions of SR-G1 and hen’s egg ovomucoid molecule.

| $\Delta G$<br>(kcal/mol) | $K_d$ (nM)<br>at 25 °C | ICs<br>charged-<br>charged | ICs<br>charged-<br>polar | ICs<br>charged-<br>apolar | ICs<br>polar-<br>polar | ICs<br>polar-<br>apolar | ICs<br>apolar-<br>apolar | NIS<br>charged | NIS<br>apolar |
|--------------------------|------------------------|----------------------------|--------------------------|---------------------------|------------------------|-------------------------|--------------------------|----------------|---------------|
| -12.3                    | 0.93                   | 15                         | 24                       | 30                        | 13                     | 21                      | 8                        | 22.65          | 38.24         |

Abbreviations used:  $\Delta G$ : binding affinity as Gibbs free energy;  $K_d$ : binding affinity as dissociation constant; ICs: number of interatomic contacts; NIS: non-interacting surfaces.

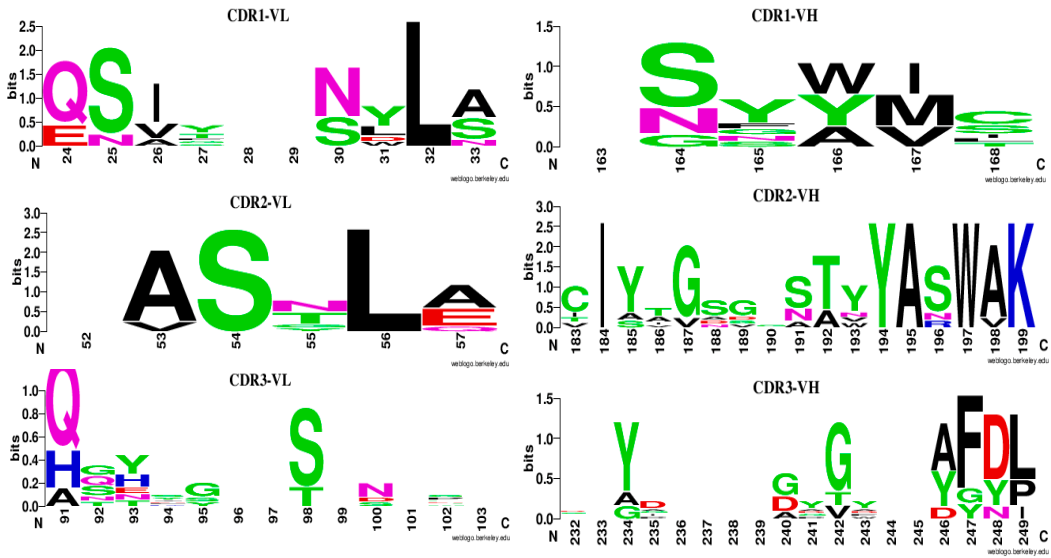

**Figure S1.** Analysis of scFv genes diversity of 20 single colonies randomly selected from the constructed immune rabbit phage display scFv library. The plots were generated by WebLogo website (<http://weblogo.berkeley.edu/logo.cgi>) and illustrate the generated diversity of the complementarity determining regions (CDRs) within the variable regions of both light (CDR1-3 VL) and heavy chains (CDR1-3 VH) of the scFv sequences.

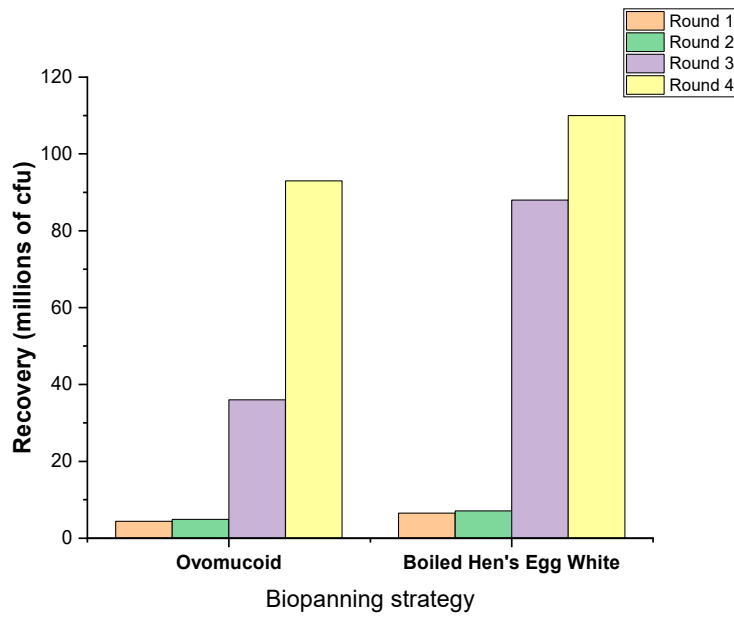

**Figure S2.** Evaluation of the library enrichment by phage titration after each round of selection for the ovomucoid and boiled egg white panning strategies.

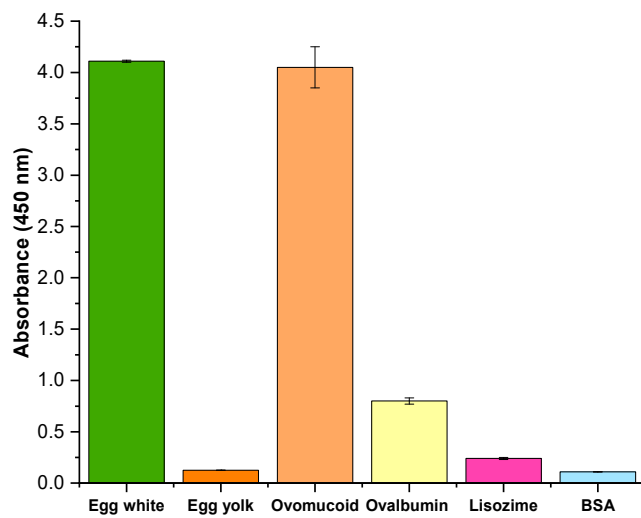

**Figure S3.** Specificity of the SR-G1 phage-ELISA against egg white (140  $\mu\text{g/mL}$ ), egg yolk (140  $\mu\text{g/mL}$ ) and major allergenic hen's egg proteins at a concentration of 10  $\mu\text{g/mL}$ . The data is expressed as an average of duplicate measurements with their standard deviations.
